# Supplementary material
Source: publisher figshare collection journal article supplement (https://springernature.figshare.com/ndownloader/files/14397626)
Supplement: Supplementary file [file 14397626]

1 **Supplementary Table 1 GWAS identified COPD-associated risk loci.**

| Susceptibility locus              | Population information                                                                                                                                                                                                            | Sample size                                       | Reference                   |
|-----------------------------------|-----------------------------------------------------------------------------------------------------------------------------------------------------------------------------------------------------------------------------------|---------------------------------------------------|-----------------------------|
| CHRNA3<br>CHRNA5<br>IREB2         | GWAS of COPD in Norway with replication of top associated variants in additional cohorts (ICGN, NETT-NAS, and BEOCOPD)                                                                                                            | 1,633 participants                                | Pillai SG, et al. (2009)[1] |
| FAM13A                            | GWAS of COPD in Norway, NETT-NAS, and ECLIPSE. Replication was performed in additional cohort (COPDGene, BEOCOPD and ICGN)                                                                                                        | 2940 cases and 1380 smoking controls              | Cho MH, et al. (2010)[2]    |
| BICD1                             | GWAS of percent emphysema detected by computed tomography (CT) in the Norway, ECLIPSE, and NETT studies.                                                                                                                          | 2,380 patients with COPD                          | Kong X, et al. (2011)[3]    |
| FTO                               | GWAS of body mass index (BMI) in ~ in three cohorts: ECLIPSE, Norway, and NETT, with replication attempted in 502 subjects in COPDGene. A GWAS of fat-free mass index (FFMI) in COPD subjects was conducted in ECLIPSE and Norway | 3,000 COPD subjects                               | Wan E, et al. (2011)[4]     |
| FGF7                              | Norway, NETT, NAS, ECLIPSE                                                                                                                                                                                                        | 2,940 cases and 1,380 controls                    | Brehm JM, et al. (2011)[5]  |
| RIN3<br>MMP12<br>TGFB2            | GWAS of COPD in cohorts: ECLIPSE, NETT/NAS, and GenKOLS (Norway)                                                                                                                                                                  | 6,633 moderate-to-severe cases and 5,704 controls | Cho MH, et al. (2014)[6]    |
| LINGO2<br>RETNLB<br>SGCD<br>PDSS2 | The multicenter LHS cohort                                                                                                                                                                                                        | 2,657 cases and 2,814 controls                    | Hansel NN, et al. (2015)[7] |

2 ICGN = International COPD Genetics Network, NETT = National Emphysema Treatment Trial, NAS = Normative Aging Study,

3 BEOCOPD = Boston Early-Onset COPD, Genetic Epidemiology of COPD: COPDGene Study, HRCT = high resolution computed tomography of the thorax, LHS = Lung Health Study

References are listed in the additional file 5
